# Supplementary material for: Synthesis, characterization and assembly of BiOCl nanostructure and their photocatalytic properties
Source: Royal Society of Chemistry journal article supplement (doi:10.1039/b909013b), 2009-01-01
Supplement: b909013b.pdf [file b909013b.pdf]

## Supporting information

### Synthesis, Characterization and Assembly of BiOCl nanostructure and their Photocatalytic Property

Yongqian Lei,<sup>a,b</sup> Guanhua Wang,<sup>a,b</sup> Shuyan Song,<sup>a,b</sup> Weiqiang Fan,<sup>a,b</sup> Hongjie Zhang<sup>\*b</sup>

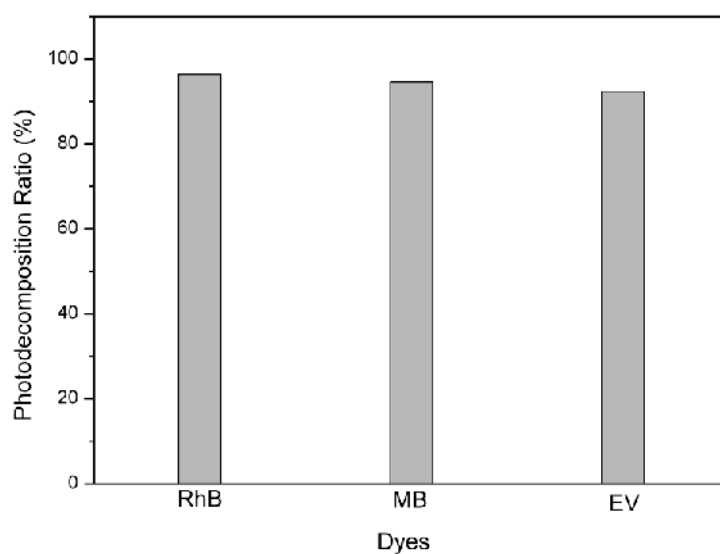

**Fig. S.** the Photodecomposition ratio of the flowerlike sample with different dyes RhB, MB and EV.
